# Supplementary material for: Electrochemical Oxidations ofp-Doped Semiconducting Single-Walled Carbon Nanotubes
Source: Hindawi journal article supplement (doi:10.1155/2016/8073593), 2016-01-01
Supplement: f1 [file 8073593.f1.docx]

**Supporting Information**

**for**

**Electrochemical Oxidations of p-Doped Semiconducting Single-Walled Carbon Nanotubes**

Huaping Li and Lili Zhou

Chemelectronics LLC, 440 Hindry Avenue, Unit E, Inglewood CA 90301, USA

**Electrochemical Measurements**

All electrolyte solutions for electrochemical measurements were prepared with CH2Cl2 and THF purged with Ar before measuring. The [(t-Butyl)4N+][PF6-] was used as electrolyte. Cyclic voltammetric measurements were conducted in a three-electrode glass cell at room temperature. A coiled platinum mesh, a Ag/AgCl aqueous solution, and a gold wire were used as counter, reference, and working electrodes, respectively. All electrode potentials are referenced to Ag/AgCl electrode. Electrochemical experiments were performed with a CHI-660 electrochemical workstation. The formal redox potential was determined by cyclic voltammetry.
